# Supplementary material
Source: Springer Nature journal article supplement (https://www.springermedizin.de/resource/supplementary/12882_2004_34_MOESM3_ESM.pdf/9454812)

**HbA1c (gr/dl)**

**Cyclosporine level (mg/dl)**

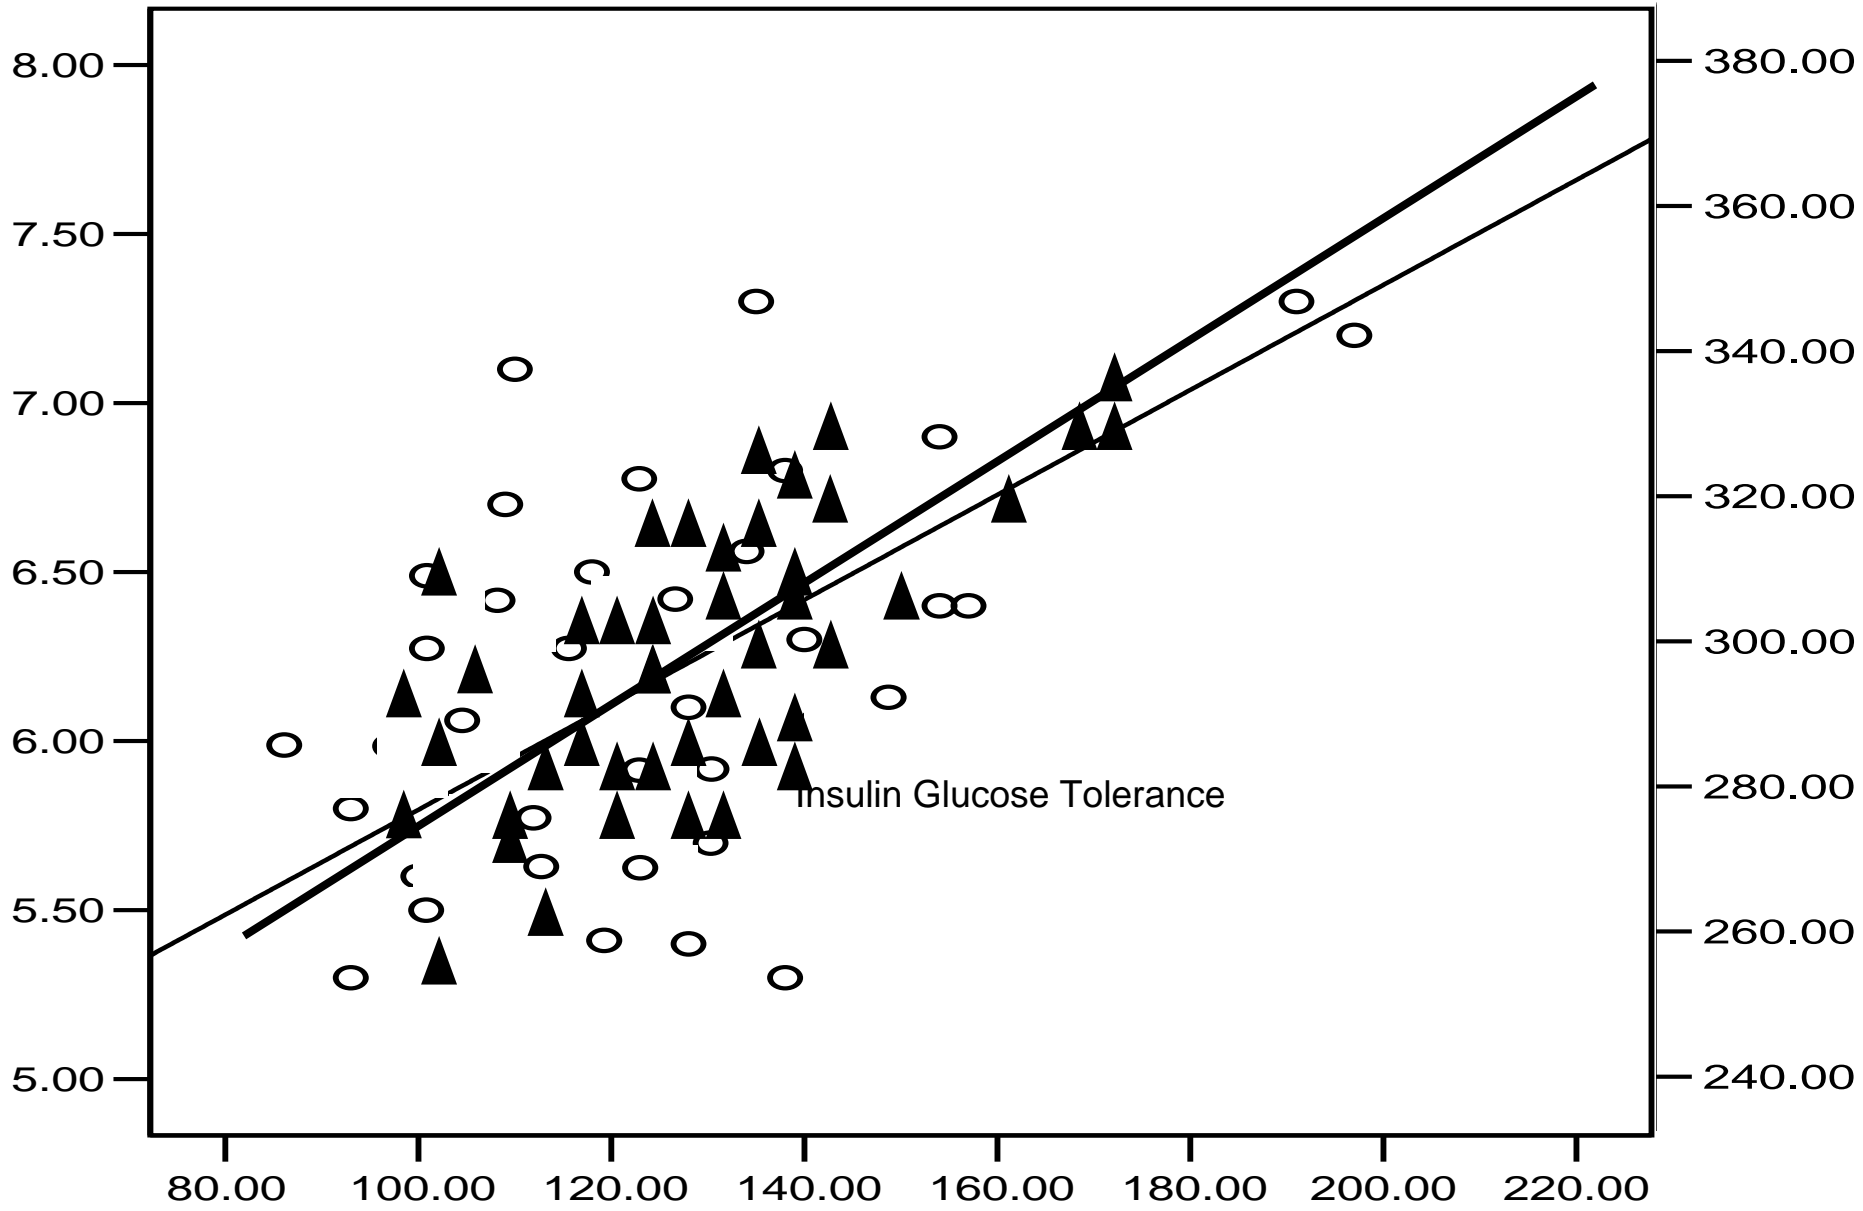

Supplement: MOESM3 [file 9454812]
